# Supplementary material for: The Reciprocal Relationship between Socioeconomic Status and Health and the Influence of Sex: A European SHARE-Analysis Based on Structural Equation Modeling
Source: Int J Environ Res Public Health. 2021 May 10;18(9):5045. doi: 10.3390/ijerph18095045 (PMC8126237; doi:10.3390/ijerph18095045)
Supplement: Supplementary file 1 [file ijerph-18-05045-s001.zip › ijerph-1205841-supplementary.pdf]

# Supplementary Table

**Table S1.** Coefficients and 95% confidence intervals (CIs) for the associations between SES (i.e., income and wealth) and trajectories ( $\Delta$ ) of SES and between health and health trajectories ( $\Delta$ ) (i.e., changes in cognitive function, grip strength, quality of life and depressive symptoms).

|                                                      | Men                     | Women                   | Sex diff (men vs women) <sup>a</sup> |
|------------------------------------------------------|-------------------------|-------------------------|--------------------------------------|
| Income                                               | Coefficient (95% CI)    | Coefficient (95% CI)    | P-values <sup>a</sup>                |
| Cognitive composite score (CCS)                      |                         |                         |                                      |
| Income $\rightarrow \Delta$ income                   | -0.736 (-0.745, -0.728) | -0.786 (-0.794, -0.778) | <0.001                               |
| CCS $\rightarrow \Delta$ CCS                         | -0.510 (-0.518, -0.502) | -0.526 (-0.534, -0.519) | <0.001                               |
| Grip strength (GS)                                   |                         |                         |                                      |
| Income $\rightarrow \Delta$ income                   | -0.723 (-0.732, -0.714) | -0.772 (-0.781, -0.763) | <0.001                               |
| GS $\rightarrow \Delta$ GS                           | -0.523 (-0.533, -0.513) | -0.525 (-0.535, -0.515) | 0.567                                |
| Quality of life                                      |                         |                         |                                      |
| Income $\rightarrow \Delta$ income                   | -0.738 (-0.748, -0.729) | -0.788 (-0.797, -0.779) | <0.001                               |
| Quality of life $\rightarrow \Delta$ quality of life | -0.498 (-0.506, -0.491) | -0.501 (-0.508, -0.494) | 0.999                                |
| Depressive symptoms                                  |                         |                         |                                      |
| Income $\rightarrow \Delta$ income                   | -0.725 (-0.734, -0.717) | -0.774 (-0.782, -0.766) | <0.001                               |
| Depression $\rightarrow \Delta$ depression           | -0.501 (-0.508, -0.493) | -0.503 (-0.509, -0.497) | 0.212                                |
| Wealth                                               |                         |                         |                                      |
| Cognitive composite score (CCS)                      |                         |                         |                                      |
| Wealth $\rightarrow \Delta$ wealth                   | -0.418 (-0.425, -0.411) | -0.426 (-0.432, -0.419) | 0.039                                |
| CCS $\rightarrow \Delta$ CCS                         | -0.508 (-0.516, -0.500) | -0.525 (-0.533, -0.518) | <0.001                               |
| Grip strength (GS)                                   |                         |                         |                                      |
| Wealth $\rightarrow \Delta$ wealth                   | -0.411 (-0.418, -0.403) | -0.416 (-0.423, -0.410) | 0.169                                |
| GS $\rightarrow \Delta$ GS                           | -0.526 (-0.536, -0.516) | -0.526 (-0.536, -0.517) | 0.653                                |
| Quality of life                                      |                         |                         |                                      |
| Wealth $\rightarrow \Delta$ wealth                   | -0.424 (-0.431, -0.417) | -0.431 (-0.438, -0.425) | 0.093                                |
| Quality of life $\rightarrow \Delta$ quality of life | -0.502 (-0.510, -0.495) | -0.506 (-0.512, -0.499) | 0.960                                |
| Depressive symptoms                                  |                         |                         |                                      |
| Wealth $\rightarrow \Delta$ wealth                   | -0.414 (-0.421, -0.407) | -0.421 (-0.427, -0.415) | 0.055                                |
| Depression $\rightarrow \Delta$ depression           | -0.501 (-0.509, -0.494) | -0.504 (-0.510, -0.499) | 0.242                                |

<sup>a</sup> *p*-values for sex differences within each of the reciprocal associations; All associations are adjusted for age group, European region, wave, marital status, and employment.
